# Supplementary material for: Effects of Toxic Compounds in Montipora capitata on Exogenous and Endogenous Zooxanthellae Performance and Fertilization Success
Source: PubMed Central journal article supplement (PMC4340954; doi:10.1371/journal.pone.0118364), 2015-02-25
Supplement: pone.0118364.s001.pdf [file pone.0118364.s001.pdf]

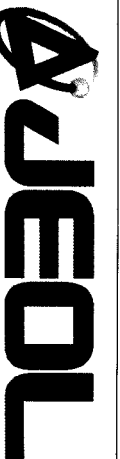

----- PROCESSING PARAMETERS -----  
dc balance : 0 : FALSE  
sexp : 0.2[Hz] : 0.0[ls]  
trapzoid3 : 0 [%] : 80[%] : 100[%]  
zerofill : 1  
fft : 1 : TRUE : TRUE  
machinephase  
ppm

EtOAc-soluble less polar fraction

This fraction indicates the presence of less polar diacetylenes

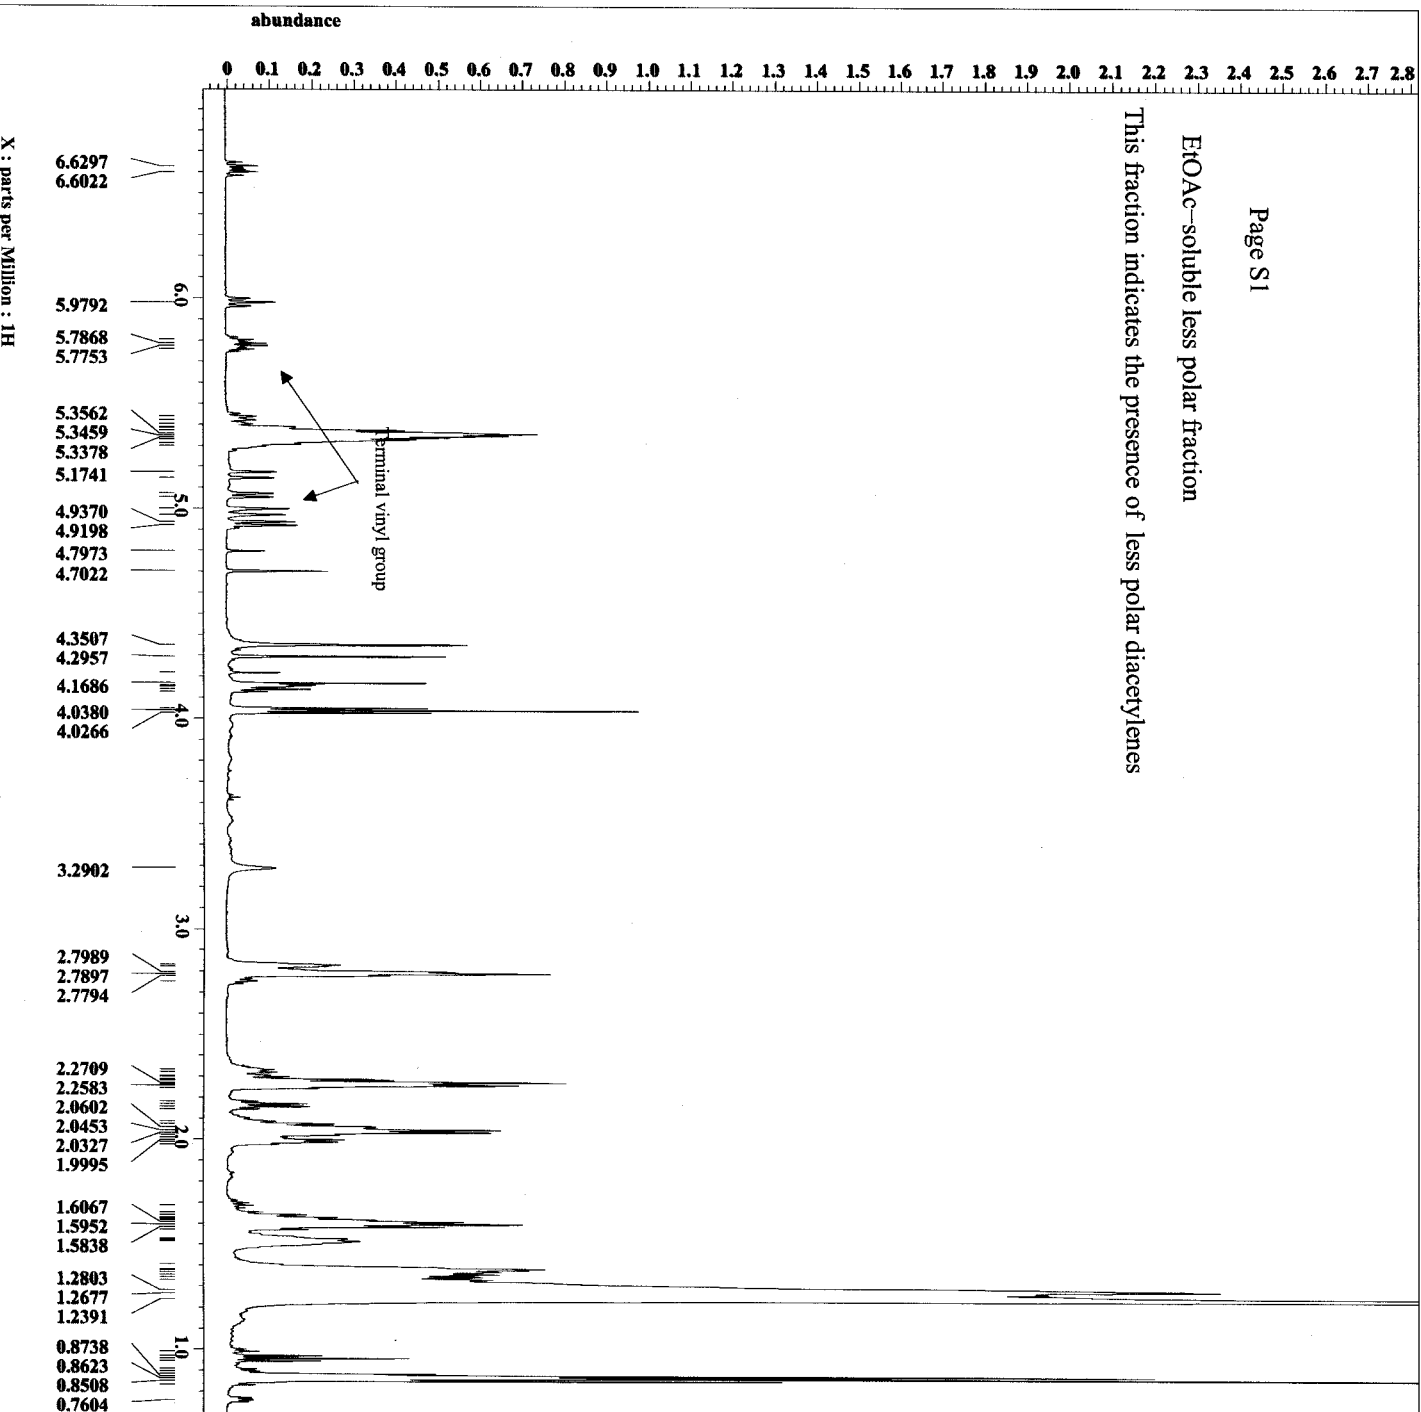

Filename = 3sg87-1-cdd13-single\_  
Author = Smithsonian  
Experiment = single\_pulse.ex2  
Sample\_id = 3sg87-1-cdd13  
Solvent = CHLOROFORM-D  
Creation\_time = 2-FEB-2012 10:19:33  
Revision\_time = 18-NOV-2014 09:23:58  
Current\_time = 18-NOV-2014 09:25:03

Comment  
Date\_format = ID\_COMPLEX  
Dim\_size = 13107  
Dim\_title = 1H  
Dim\_units = [ppm]  
Dimensions = X  
Site = ECA 600  
Spectrometer = ECA600-A1D

Field strength = 14.06636928[T] (600 [M  
X\_acq\_duration = 1.4548992[ls]  
X\_domain = 1H  
X\_freq = 600.1723046[MHz]  
X\_offset = 5[ppm]  
X\_points = 16384  
X\_prescans = 1  
X\_resolution = 0.68733284[Hz]  
X\_sweep = 11.26126126[MHz]  
Irr\_domain = 1H  
Irr\_freq = 600.1723046[MHz]  
Irr\_offset = 5[ppm]  
Tri\_domain = 1H  
Tri\_freq = 600.1723046[MHz]  
Tri\_offset = 5[ppm]  
Clipped = FALSE  
Mod\_return = 1  
Scans = 8  
Total\_scans = 8

X\_90\_width = 6.6[us]  
X\_acq\_time = 1.4548992[ls]  
X\_angle = 45[deg]  
X\_dbf = 3[db]  
X\_pulse = 3.3[us]  
Irr\_mode = Off  
Tri\_mode = Off  
Dance\_preset = FALSE  
Initial\_wait = 1[ls]  
Recvr\_gain = 36  
Relaxation\_delay = 5[ls]  
Repetition\_time = 6.4548992[ls]  
Temp\_get = 22.9[degC]
