# Supplementary material for: Effects of Toxic Compounds in Montipora capitata on Exogenous and Endogenous Zooxanthellae Performance and Fertilization Success
Source: PubMed Central journal article supplement (PMC4340954; doi:10.1371/journal.pone.0118364), 2015-02-25

n-Butanol-soluble polar fraction

This fraction indicates the presence of polar diacetylene acids

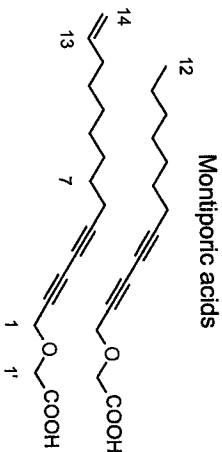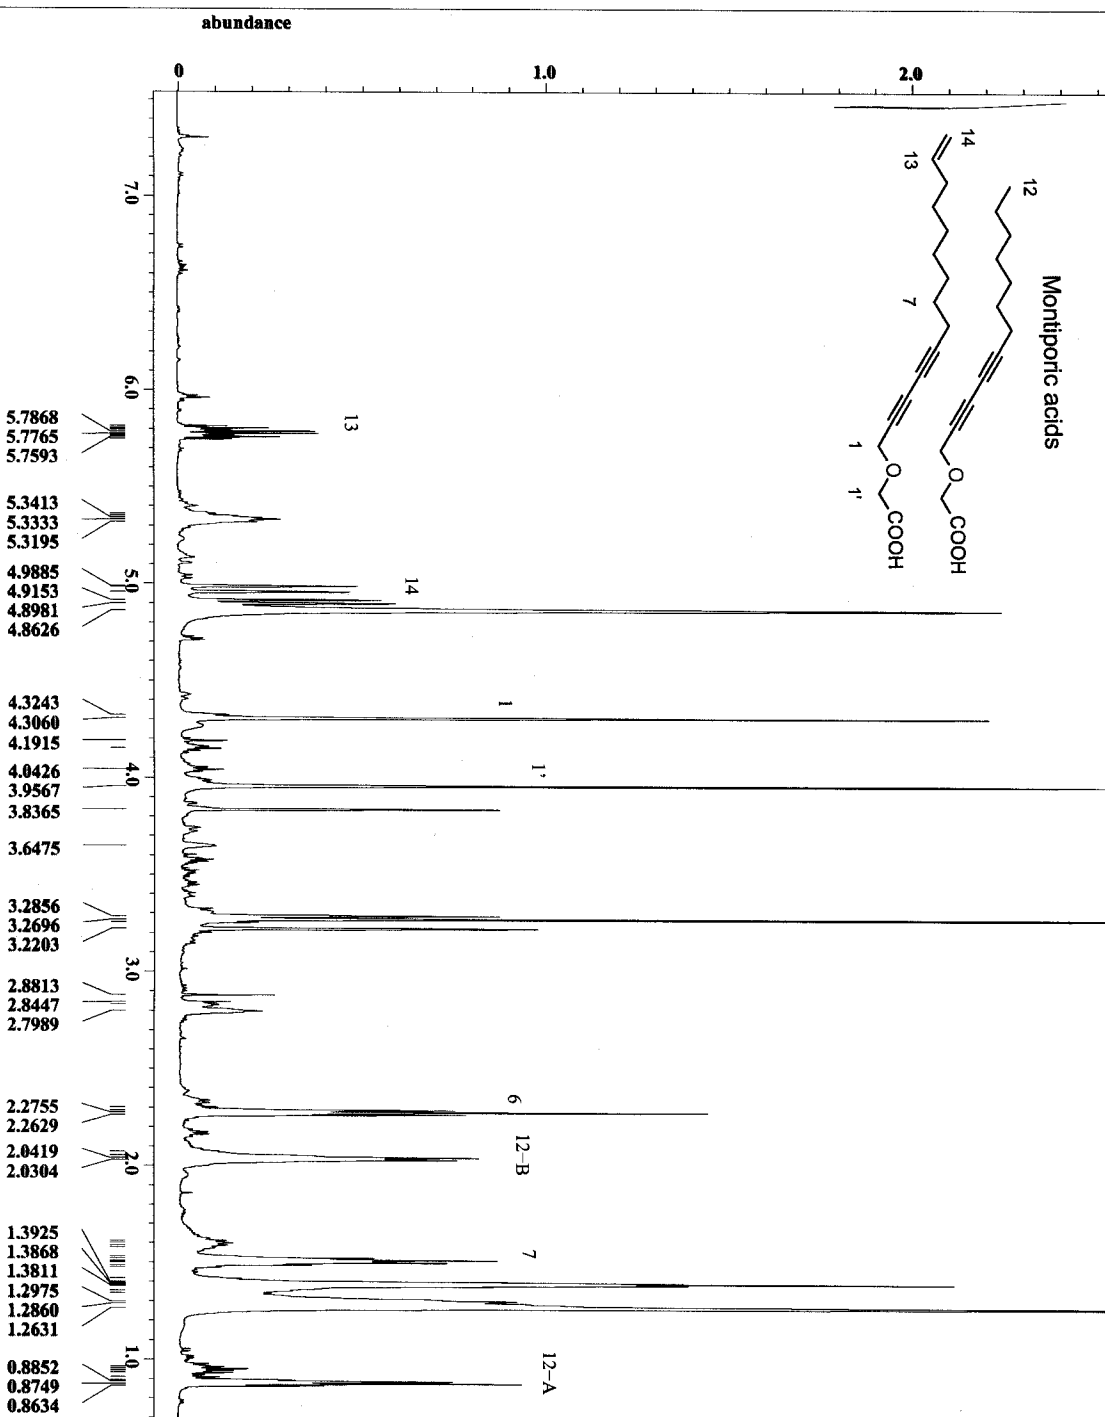

X : parts per Million : 1H

----- PROCESSING PARAMETERS -----  
 dc\_balance : 0 : FALSE  
 temp : 0.2 [Hz] : 0.0 [s]  
 trapezoid3 : 0 [%] : 80 [%] : 100 [%]  
 zerofill : 1  
 fit : 1 : TRUE : TRUE  
 machinephase  
 ppm

Filename = 3q987-2-cd3od-single\_  
 Author = Smitheonlan  
 Experiment = single\_pulse.ex2  
 Sample\_id = 3q987-2-cd3od  
 Solvent = METHANOL-D3  
 Creation\_time = 9-FEB-2012 16:24:17  
 Revision\_time = 18-NOV-2014 09:29:09  
 Current\_time = 18-NOV-2014 09:29:47

Comment = single pulse  
 Data\_format = 1D COMPLEX  
 Dim\_size = 13107  
 Dim\_title = 1H  
 Dim\_units = [ppm]  
 Dimensions = X  
 Site = ECA 600  
 Spectrometer = ECA600-AID

Field\_strength = 14.09636928 [T] (600 [M  
 X\_acq\_duration = 1.4548992 [s]  
 X\_domain = 1H  
 X\_freq = 600.1723046 [MHz]  
 X\_offset = 5 [ppm]  
 X\_points = 16384  
 X\_resolution = 1.06733284 [Hz]  
 X\_prescans = 11.26126126 [kHz]  
 X\_resolution = 0.68733284 [Hz]  
 X\_sweep = 11.26126126 [kHz]  
 Irr\_domain = 1H  
 Irr\_freq = 600.1723046 [MHz]  
 Irr\_offset = 5 [ppm]  
 Irr\_domain = 1H  
 Tri\_freq = 600.1723046 [MHz]  
 Tri\_offset = 5 [ppm]  
 Mod\_return = FALSE  
 Total\_scans = 8

X\_90\_width = 6.6 [us]  
 X\_acq\_time = 1.4548992 [s]  
 X\_angle = 45 [deg]  
 X\_atn = 3 [db]  
 X\_atn = 3.3 [us]  
 X\_pulse = Off  
 Tri\_mode = OFF  
 Dante\_presat = FALSE  
 Initial\_walt = 1 [s]  
 Recvr\_gain = 30  
 Relaxation\_delay = 5 [s]  
 Repetition\_time = 6.4548992 [s]  
 Temp\_get = 23.1 [dC]

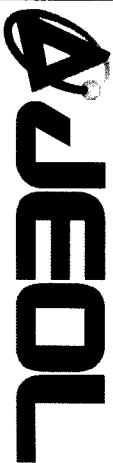

Supplement: pone.0118364.s002.pdf [file pone.0118364.s002.pdf]
