# Supplementary material for: Effects of Toxic Compounds in Montipora capitata on Exogenous and Endogenous Zooxanthellae Performance and Fertilization Success
Source: PubMed Central journal article supplement (PMC4340954; doi:10.1371/journal.pone.0118364), 2015-02-25

Water-soluble polar fraction

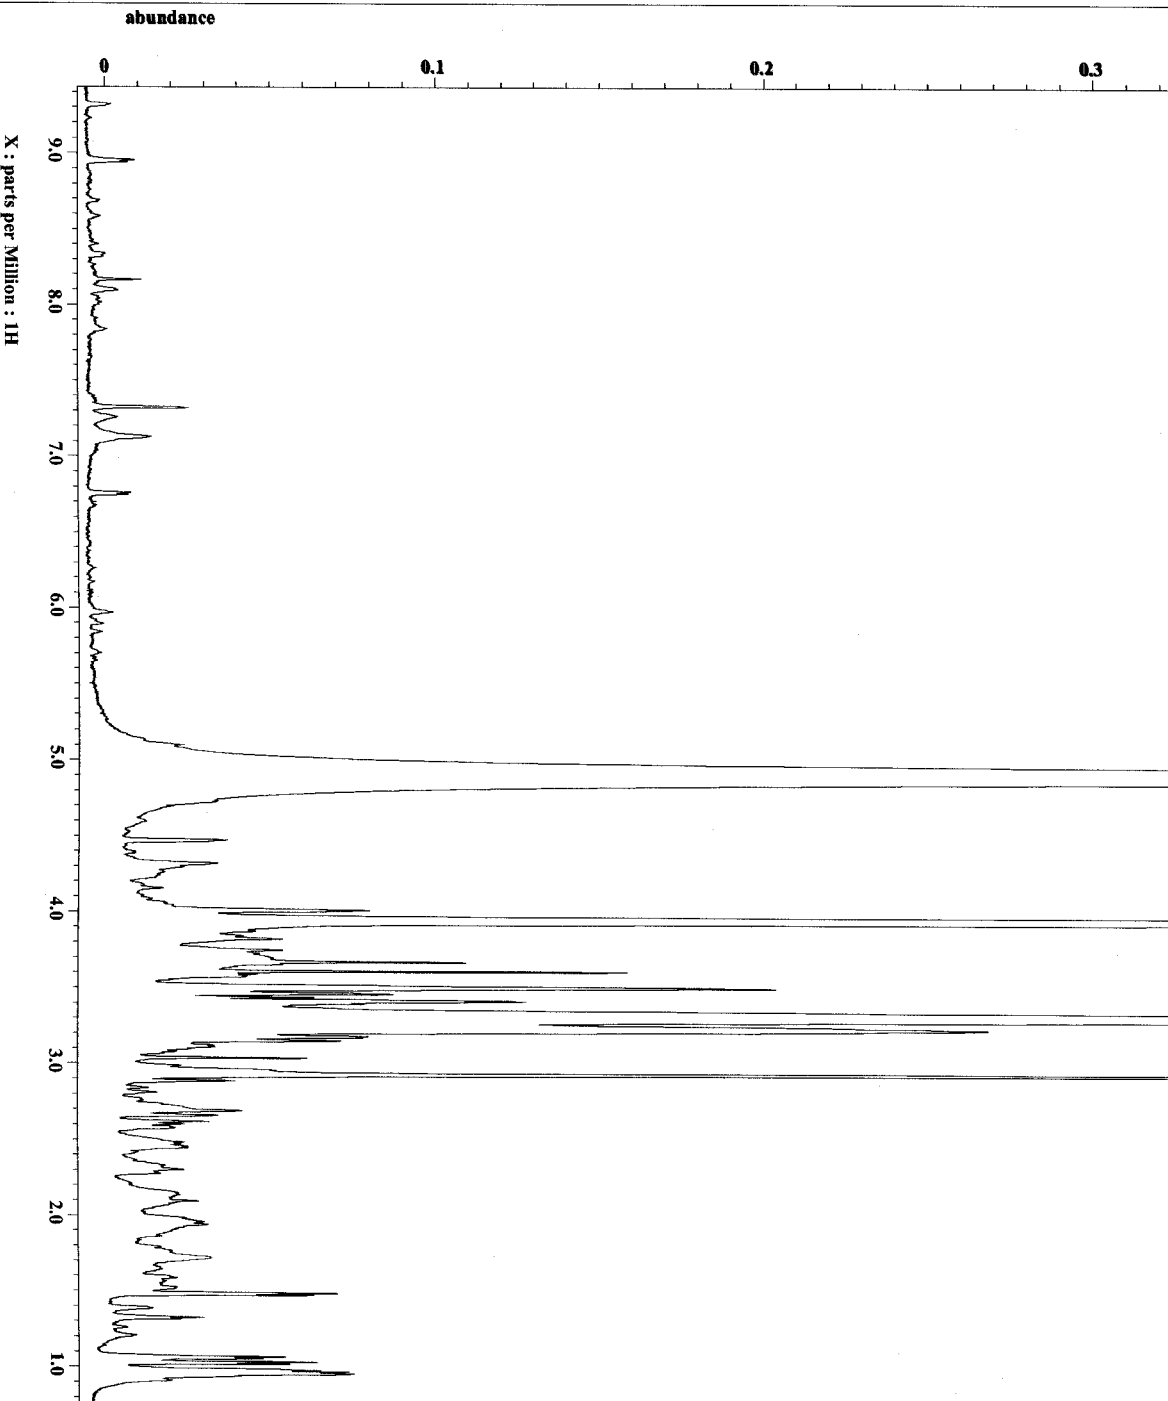

----- PROCESSING PARAMETERS -----  
 dc\_balance : 0 : FALSE  
 serp : 0.2 [Hz] : 0.0 [s]  
 trapezoid3 : 0 [%] : 80 [%] : 100 [%]  
 zerofill : 1  
 fit : 1 : TRUE : TRUE  
 machinephase  
 ppm  
 phase : 2 : 0 : 50 [%]

Filename = 3sg87-3-cd3od-single\_  
 Author = Smithsonian  
 Experiment = single\_pulse.ex2  
 Sample\_id = 3sg87-3-cd3od  
 Solvent = METHANOL-D3  
 Creation\_time = 9-FEB-2012 16:32:13  
 Revision\_time = 18-NOV-2014 09:33:40  
 Current\_time = 18-NOV-2014 09:36:22

Comment = single\_pulse  
 Data\_format = 1D COMPLEX  
 Dim\_size = 13107  
 Dim\_title = 1H  
 Dim\_units = [ppm]  
 Dimensions = X  
 Site = ECA 600  
 Spectrometer = ECA600-AID

Field\_strength = 14.09636926 [T] (600 [Mk  
 X\_acq\_duration = 1.4548992 [s]  
 X\_domain = 1H  
 X\_freq = 600.1723046 [MHz]  
 X\_offset = 51 [ppm]  
 X\_points = 16384  
 X\_prescans = 1  
 X\_resolution = 0.68733284 [Hz]  
 X\_sweep = 11.26126126 [kHz]

Irr\_domain = 1H  
 Irr\_freq = 600.1723046 [MHz]  
 Irr\_offset = 51 [ppm]  
 Irr\_domain = 1H  
 Tri\_freq = 600.1723046 [MHz]  
 Tri\_offset = 51 [ppm]  
 Clipped = FALSE  
 Mod\_return = 1  
 Scans = 8  
 Total\_scans = 8

X\_90\_width = 6.6 [us]  
 X\_acq\_time = 1.4548992 [s]  
 X\_angle = 45 [deg]  
 X\_atn = 3 [dB]  
 X\_pulse = 3.3 [us]  
 Irr\_mode = Off  
 Tri\_mode = Off  
 Dante\_preset = FAULT  
 Initial\_wait = 1 [s]  
 Recvr\_gain = 34  
 Relaxation\_delay = 5 [s]  
 Repetition\_time = 6.4548992 [s]  
 Temp\_get = 23.1 [dC]

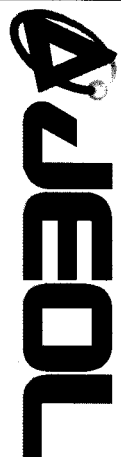

Supplement: pone.0118364.s003.pdf [file pone.0118364.s003.pdf]
